# Supplementary material for: Impact of spatial resolution on large-scale ice cover modelling of mountainous regions
Source: Copernicus journal article supplement (doi:10.5194/egusphere-2025-3870), 2025-09-19
Supplement: Supplementary file 1 [file egusphere-2025-3870-supplement.pdf]

# Impact of spatial resolution on large-scale ice cover modelling of mountainous regions - Supplement

Helen Werner<sup>1, 2</sup>, Dirk Scherler<sup>1, 3</sup>, Tancrède P. M. Leger<sup>4</sup>, Guillaume Jouvét<sup>4</sup>, Ricarda Winkelmann<sup>2, 5, 6</sup>

<sup>1</sup>Organic and Earth Surface Geochemistry, GFZ Helmholtz Centre for Geosciences, 14473 Potsdam, Germany

<sup>2</sup>Earth Resilience Science Unit, PIK Potsdam Institute for Climate Impact Research, 14473 Potsdam, Germany

<sup>3</sup>Institute of Geographical Sciences, Freie Universität Berlin, 12249 Berlin, Germany

<sup>4</sup>IDYST, Faculty of Geosciences and Environment, Université de Lausanne, CH-1015 Lausanne, Switzerland

<sup>5</sup>Institute of Physics and Astronomy, University of Potsdam, 14476 Potsdam, Germany

<sup>6</sup>Department of Integrative Earth System Science, Max Planck Institute of Geoanthropology, 07745 Jena, Germany

Correspondence to: Helen Werner (helen.werner@gfz.de)

## Experiments with smoothed DEMs

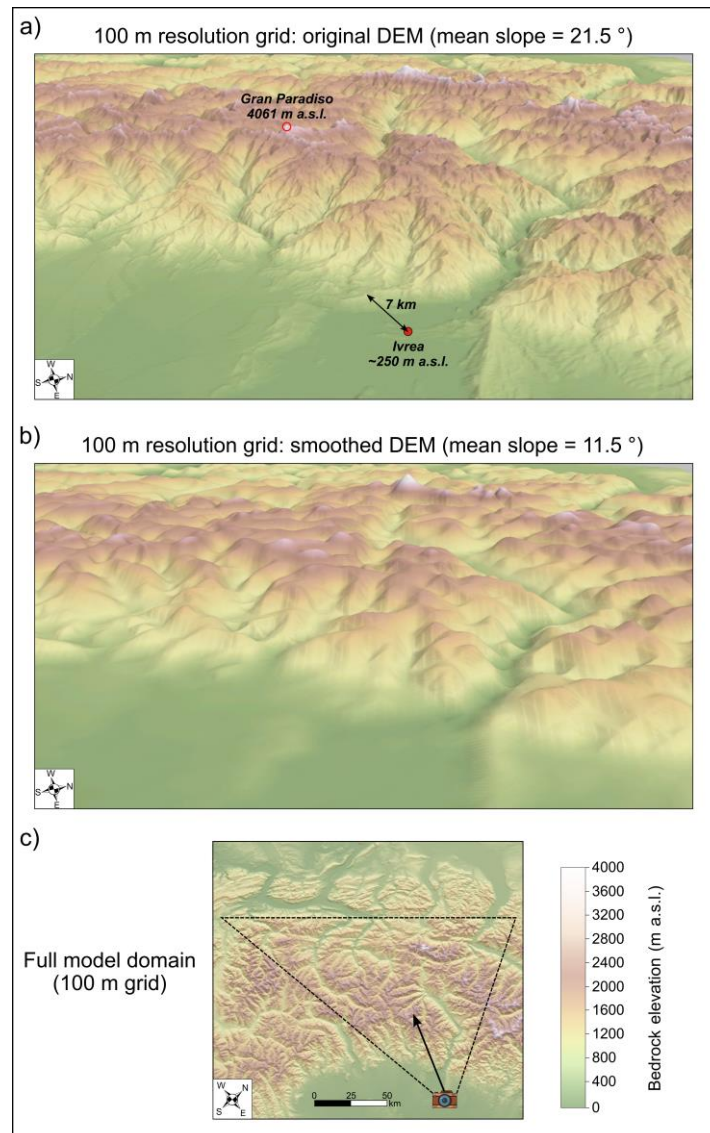

**Figure S1** Comparison of (a) original and (b) smoothed DEM, both at 100 m resolution. The smoothed DEM is based on the 2000-m DEM using cubic resampling at 100 m. The perspective of (a) and (b) inside the model domain (original 100-m DEM) is shown in (c). All panels were produced using ArcGIS Pro 3.2.2 (Esri).

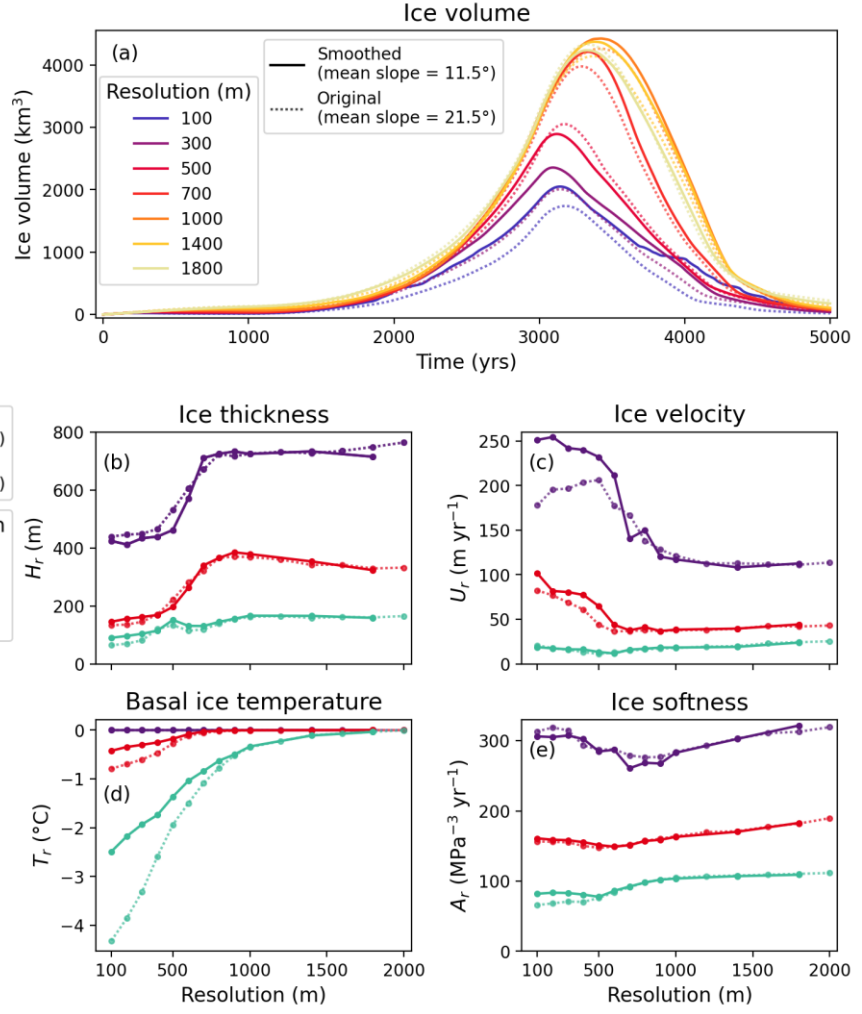

**Figure S2** Comparison of simulations with smoothed DEMs (based on the 2000-m DEM which is cubic resampled to finer resolutions, with a mean slope of 11.5°) to simulations with the original DEMs (with a mean slope of 21.5°). (a) Temporal evolution of ice volume, at 100, 300, 500, 700, 1000, 1400, 1800 m resolutions. (b)–(e) Model output variables at full glaciation averaged over glaciated area at different resolutions, distinguished between low (0–1200 m a.s.l.), mid (1200–2400 m a.s.l.), and high (>2400 m a.s.l.) bedrock altitudes: (b) Ice thickness  $H_r$ , (c) depth-averaged ice velocity  $U_r$ , (d) basal ice temperature  $T_r$ , (f) depth-averaged Arrhenius factor  $A_r$ . In all subplots, solid lines correspond to results based on the smoothed DEMs, and dashed lines correspond to results based on original DEMs.

## Additional model outputs

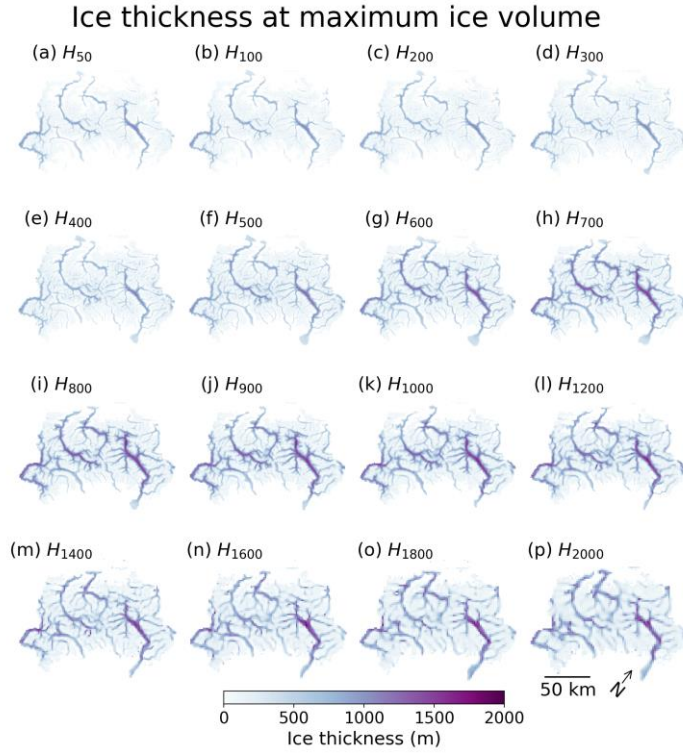

25 **Figure S3** Ice thickness  $H_r$  at maximum ice volume for models at resolution  $r = 100, 200, 300, 400, 500, 600, 700, 800, 900, 1000, 1200, 1400, 1600, 1800, \text{ and } 2000$  m.

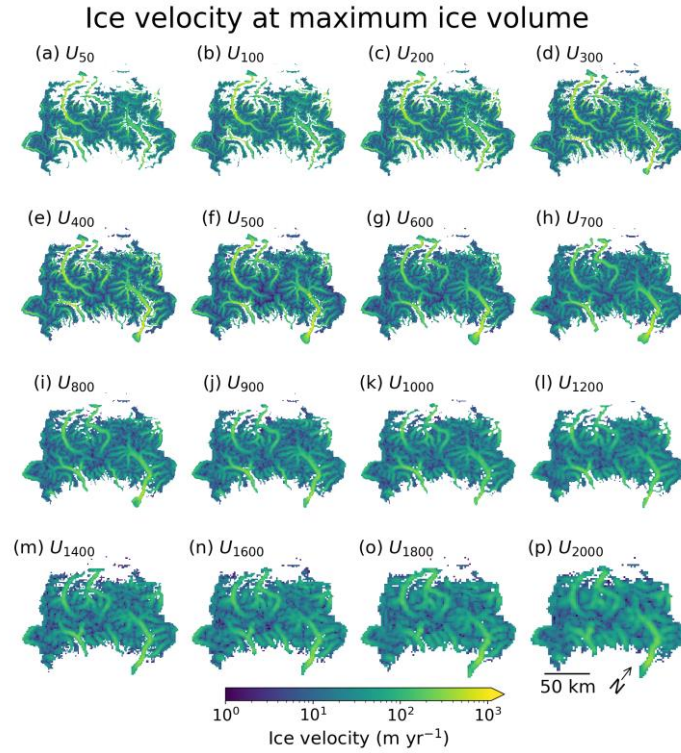

30 **Figure S4** Depth-averaged ice velocity  $U_r$  at maximum ice volume for models at resolution  $r = 100, 200, 300, 400, 500, 600, 700, 800, 900, 1000, 1200, 1400, 1600, 1800, \text{ and } 2000$  m.

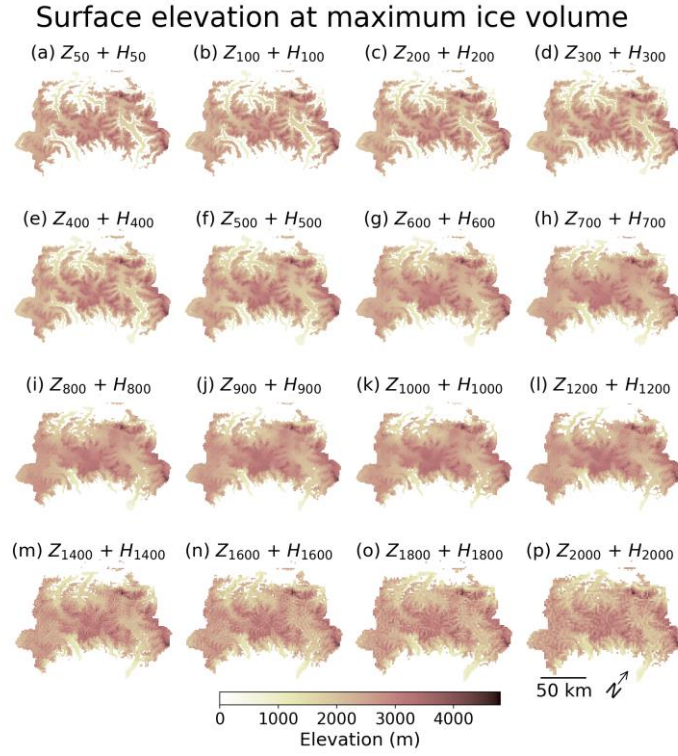

**Figure S5** Surface elevation (bedrock elevation  $Z_r$  and ice thickness  $H_r$ ) at maximum ice volume for models at resolution  $r = 100, 200, 300, 400, 500, 600, 700, 800, 900, 1000, 1200, 1400, 1600, 1800$ , and  $2000$  m.

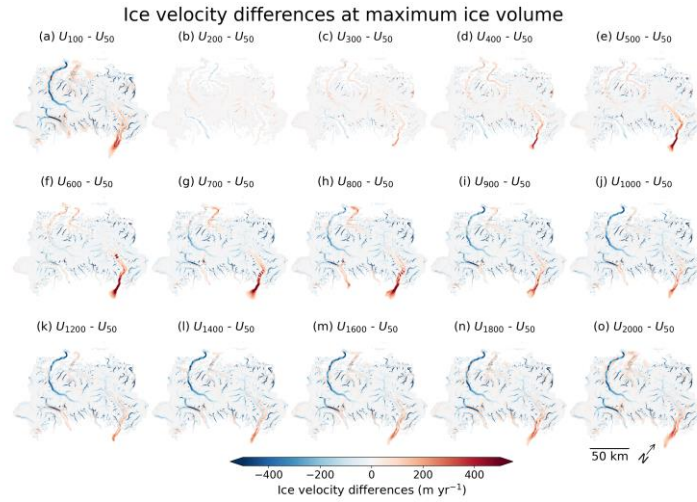

**Figure S6** Depth-averaged ice velocity differences  $U_r - U_{50}$  at maximum ice volume between models at resolution  $r = 100, 200, 300, 400, 500, 600, 700, 800, 900, 1000, 1200, 1400, 1600, 1800, 2000$  m resolution and the  $50$  m run.



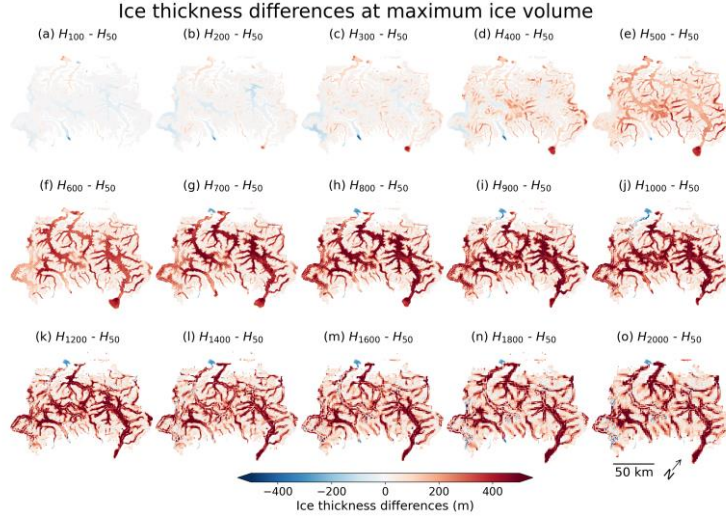

40 **Figure S7** Ice thickness differences  $H_r - H_{50}$  at maximum ice volume between models at resolution  $r = 100, 200, 300, 400, 500, 600, 700, 800, 900, 1000, 1200, 1400, 1600, 1800, 2000$  m resolution and the 50 m run.

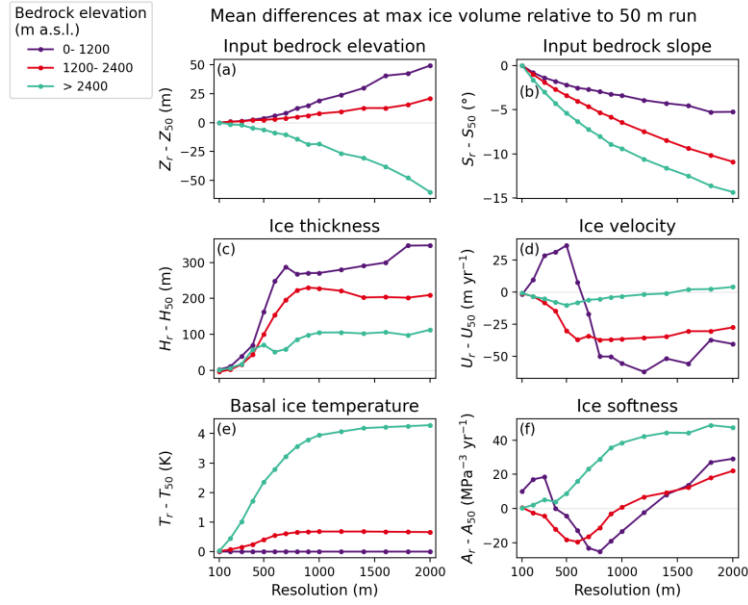

45 **Figure S8** Mean differences relative to the 50 m simulation. (a) Bedrock elevation in the DEMs  $Z_r - Z_{50}$ , (b) bedrock slope in the DEMs  $S_r - S_{50}$ , (c) ice thickness  $H_r - H_{50}$ , (d) depth-averaged ice velocity  $U_r - U_{50}$ , (e) basal ice temperature  $T_r - T_{50}$ , and (f) depth-averaged Arrhenius factor  $A_r - A_{50}$ . Differences in (c)–(f) are taken at maximum ice volume. All differences are averaged across the glaciated area at low (0–1200 m a.s.l.), mid (1200–2400 m a.s.l.), and high (>2400 m a.s.l.) altitudes.

# Surface mass balance at maximum ice volume

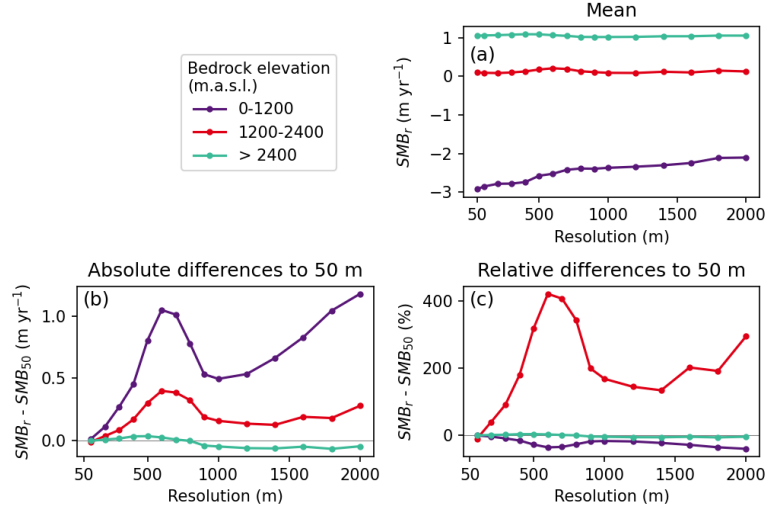

**Figure S9** Surface mass balance (SMB) at full glaciation. (a) SMB, (b) Absolute differences  $\text{SMB}_r - \text{SMB}_{50}$  between SMB in simulations at resolution  $r$  and SMB in 50 m simulation, (c) Relative differences  $\text{SMB}_r - \text{SMB}_{50}$  between SMB in simulations at resolution  $r$  and SMB in the 50 m simulation to the 50 m run. All values are averaged across the glaciated area at low (0–1200 m a.s.l.), mid (1200–2400 m a.s.l.), and high (>2400 m a.s.l.) altitudes.

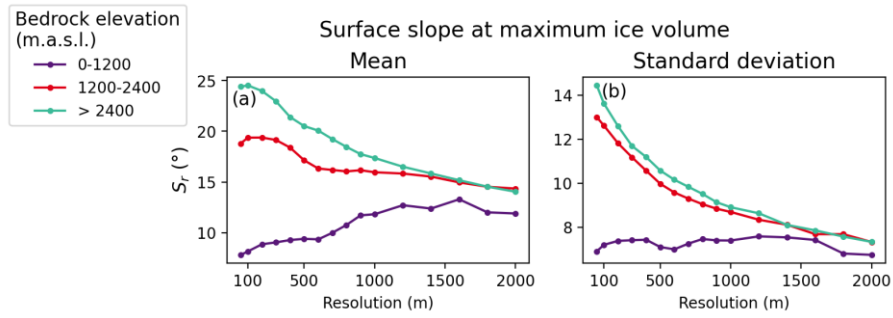

**Figure S10** (a) Mean and (b) standard deviation of slope angle of surface elevation (bedrock elevation and ice thickness) at full glaciation across the glaciated area at low (0–1200 m a.s.l.), mid (1200–2400 m a.s.l.), and high (>2400 m a.s.l.) altitudes.

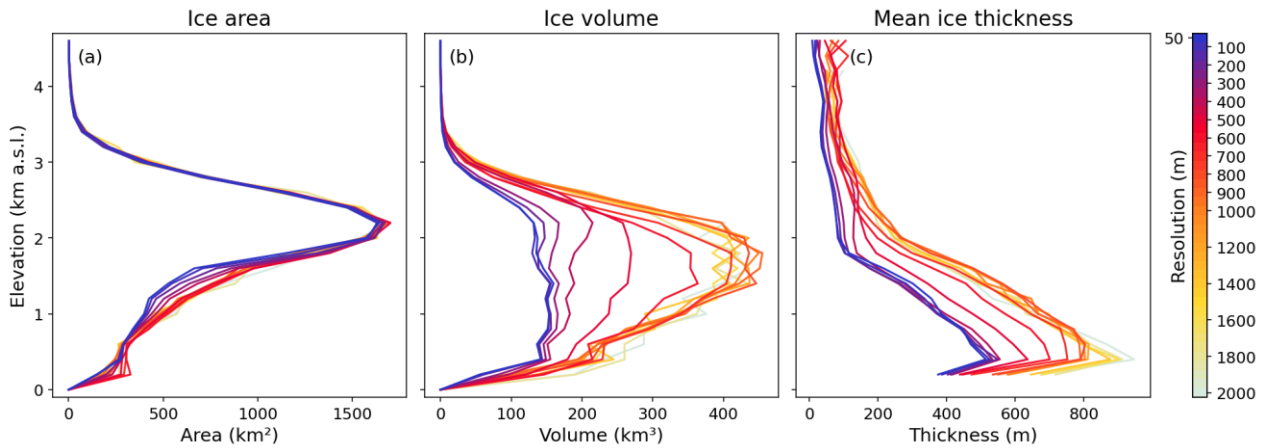

**Figure S11** (a) Ice area, (b) ice volume, and (c) mean ice thickness across bedrock elevation at full glaciation averaged over 200-m elevation bins.

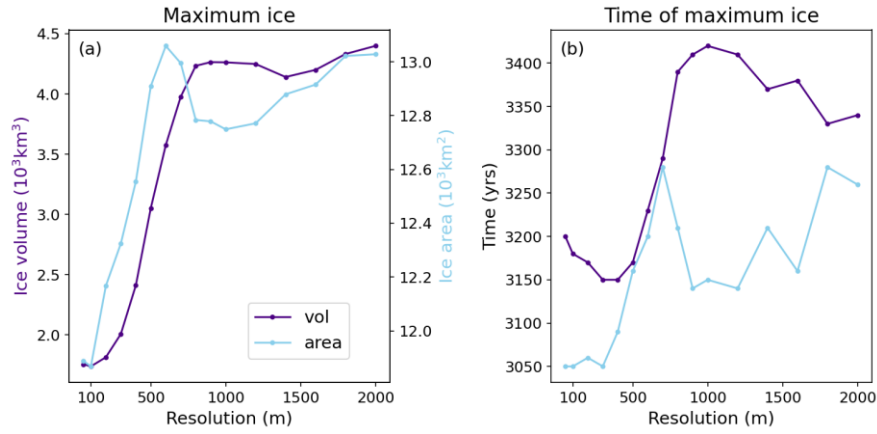

**Figure S12** (a) Maximum ice volume (purple) and area (blue), (b) time of maximum ice volume (purple) and area (blue) at all resolutions.

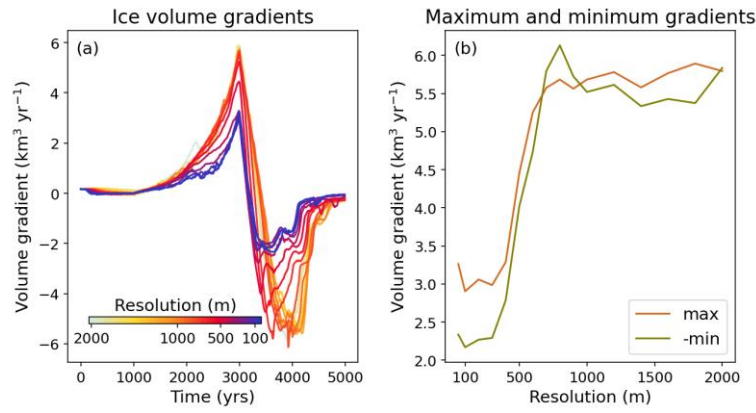

65 **Figure S13** (a) Temporal evolution of ice volume gradients of all resolution runs. (b) Maximum (brown) and inverse minimum (green) ice volume gradient of resolution runs.

### Simulations using slower temperature forcing

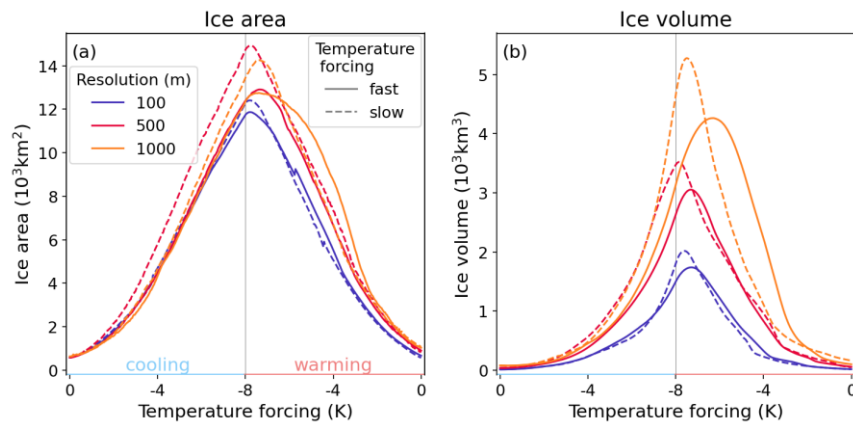

70 **Figure S14** Ice area (a) and volume (b) of fast (solid line) and slow (dashed line) temperature forcing runs at 100 (blue), 500 (red), and 1000 m (orange) resolution.

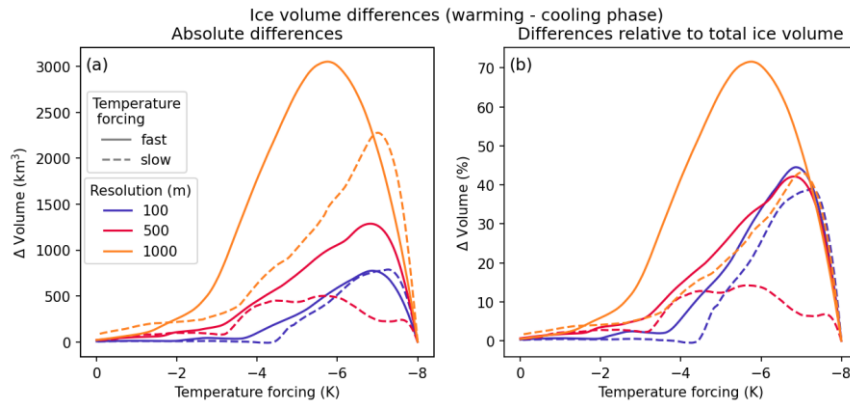

75 **Figure S15** Differences of ice volume at times with the same temperature forcing value during the warming and cooling phases (warming minus cooling phase). (a) Absolute differences, (b) differences relative to the total ice volume. Solid lines are simulations using the fast (4 K/kyrs) and dashed lines are simulations using the slow (2 K/kyrs) temperature forcing at 100 (blue), 500 (red), and 1000 m (orange) resolution.

## Model parameters and climate input

**Table S1** Model parameters from Leger et al. 2025's ensemble best-scoring simulation, simulation 37.

| IGM module / parameter name | Description                                                                | System component     | Value              | Unit                                   |
|-----------------------------|----------------------------------------------------------------------------|----------------------|--------------------|----------------------------------------|
| <b>Surface mass balance</b> |                                                                            |                      |                    |                                        |
| smb_accpdd_update_freq      | Frequency at which the Surface Mass Balance (SMB) is updated               | Surface mass balance | 1.0                | yr                                     |
| accpdd_refreeze_factor      | Positive Degree Day refreezing factor                                      | Surface mass balance | 0.6156090086419556 | n/a                                    |
| smb_accpdd_thr_temp_snow    | Threshold temperature for solid precipitation                              | Surface mass balance | 0.0                | °C                                     |
| smb_accpdd_thr_temp_rain    | Threshold temperature for liquid precipitation                             | Surface mass balance | 2.0                | °C                                     |
| smb_accpdd_melt_factor_snow | Positive Degree Day melt rate for snow                                     | Surface mass balance | 1.20409532638      | m we °C <sup>-1</sup> yr <sup>-1</sup> |
| smb_accpdd_melt_factor_ice  | Positive Degree Day melt rate for ice                                      | Surface mass balance | 2.8262694332550296 | m we °C <sup>-1</sup> yr <sup>-1</sup> |
| smb_accpdd_shift_hydro_year | This serves to start Oct 1 the acc/melt computation                        | Surface mass balance | 0.75               | yr                                     |
| smb_accpdd_ice_density      | Density of ice for conversion of SMB into ice equivalent                   | Surface mass balance | 910.0              | kg m <sup>-3</sup>                     |
| smb_accpdd_wat_density      | Density of water                                                           | Surface mass balance | 1000.0             | kg m <sup>-3</sup>                     |
| <b>Ice flow</b>             |                                                                            |                      |                    |                                        |
| iflo_enhancement_factor     | Flow law enhancement factor                                                | Ice flow             | 1.3885266806845515 | n/a                                    |
| iflo_regu_glen              | Regularisation parameter for Glen's flow law                               | Ice flow             | 0.0                | n/a                                    |
| iflo_regu_weertmann         | Regularisation parameter for Weertman's sliding law                        | Basal sliding        | 10 <sup>-10</sup>  | n/a                                    |
| iflo_exp_glen               | Glen's flow law exponent                                                   | Ice flow             | 3.0                | n/a                                    |
| iflo_exp_weertman           | Weertman's law exponent                                                    | Basal sliding        | 4.0                | n/a                                    |
| iflo_gravity_cst            | Acceleration due to gravity of a free falling object                       | Ice flow             | 9.81               | m s <sup>-2</sup>                      |
| iflo_ice_density            | Density of ice                                                             | Ice flow             | 910.0              | kg m <sup>-3</sup>                     |
| iflo_Nz                     | Number of grid points for the vertical discretisation                      | Ice flow             | 10.0               | n/a                                    |
| iflo_vert_spacing           | Discretisation density to get more points towards glacier bed than surface | Ice flow             | 4.0                | n/a                                    |
| iflo_thr_ice_thk            | Threshold ice thickness for computing strain rate                          | Ice flow             | 0.1                | m                                      |



| IGM module / parameter name      | Description                                                                          | System component | Value                                            | Unit                                 |
|----------------------------------|--------------------------------------------------------------------------------------|------------------|--------------------------------------------------|--------------------------------------|
| iflo_dim_arrhenius               | Dimension of the Arrhenius factor (horizontal 2D or 3D)                              | Ice flow         | 3.0                                              | n/a                                  |
| iflo_retrain_emulator_freq       | Frequency at which the emulator is retrained, 0 means never, 1 means every time step | Neural network   | 2.0 (50, 100 m res.)*,<br>7.0 (else)             | time step                            |
| iflo_retrain_emulator_lr         | Learning rate for the retraining of the emulator                                     | Neural network   | $10^{-5}$                                        | n/a                                  |
| iflo_retrain_emulator_nbit       | Number of iterations at each time step for retraining the emulator                   | Neural network   | 1.0                                              | iterations                           |
| iflo_force_max_velbar            | Artificially upper-bound of ice velocities                                           | Ice flow         | 3000.0                                           | m yr <sup>-1</sup>                   |
| iflo_network                     | Type of network, it can be cnn or unet                                               | Neural network   | “cnn”                                            | n/a                                  |
| iflo_nb_layers                   | Number of layers in the Convolutional Neural Network (CNN)                           | Neural network   | 16.0                                             | n/a                                  |
| iflo_nb_blocks                   | Number of block layer in the U-net                                                   | Neural network   | 4                                                | n/a                                  |
| iflo_nb_out_filter               | Number of output filters in the CNN                                                  | Neural network   | 32.0                                             | n/a                                  |
| iflo_conv_ker_size               | Size of the convolution kernel                                                       | Neural network   | 3.0                                              | n/a                                  |
| iflo_dropout_rate                | Dropout rate in the CNN                                                              | Neural network   | 0                                                | n/a                                  |
| iflo_min_sr                      | Minimum strain rate                                                                  | Ice flow         | $10^{-5}$                                        | yr <sup>-1</sup>                     |
| iflo_max_sr                      | Maximum strain rate                                                                  | Ice flow         | 1.0                                              | yr <sup>-1</sup>                     |
| thk_slope_type                   | Slope limiter for the ice thickness equation (godunov or superbee)                   | Ice flow         | “superbee”                                       | n/a                                  |
| vflo_method                      | Method to retrieve vertical velocities (kinematic, incompressibility)                | Ice flow         | “incompressibility”                              | n/a                                  |
| <b>Time</b>                      |                                                                                      |                  |                                                  |                                      |
| time_start                       | Simulation start                                                                     | Time             | 0.0                                              | yr                                   |
| time_end                         | Simulation end                                                                       | Time             | 5000.0<br>(9000.0 with slow temperature forcing) | yr                                   |
| time_save                        | Save output frequency                                                                | Time             | 10.0                                             | yr                                   |
| time_cfl                         | CFL number for the stability of the mass conservation scheme                         | Time             | 0.3                                              |                                      |
| time_stp_max                     | Maximum time step allowed, used only with slow ice                                   | Time             | 10.0                                             | yr                                   |
| <b>Enthalpy</b>                  |                                                                                      |                  |                                                  |                                      |
| enth_water_density               | Density of water                                                                     | Enthalpy         | 1000.0                                           | kg m <sup>-3</sup>                   |
| enth_spy                         | Number of seconds in a year                                                          | Enthalpy         | 31556926.0                                       | seconds                              |
| enth_ki                          | Conductivity of cold ice                                                             | Enthalpy         | 2.1                                              | W m <sup>-1</sup> K <sup>-1</sup>    |
| ent_ci                           | Specific heat capacity of ice                                                        | Enthalpy         | 2009.0                                           | W s kg <sup>-1</sup> K <sup>-1</sup> |
| enth_Lh                          | Latent heat of fusion                                                                | Enthalpy         | 334000.0                                         | W s kg <sup>-1</sup>                 |
| ent_KtdivKc                      | Ratio of temperate versus cold ice diffusivity                                       | Enthalpy         | 0.1                                              | n/a                                  |
| enth_claus_clape                 | Clausius-Clapeyron constant                                                          | Enthalpy         | $7.9 \times 10^{-8}$                             | K Pa <sup>-1</sup>                   |
| enth_melt_temp                   | Melting point at standard pressure                                                   | Enthalpy         | 273.15                                           | K                                    |
| enth_ref_temp                    | Reference temperature                                                                | Enthalpy         | 223.15                                           | K                                    |
| enth_till_friction_angle_bed_min | Lower bed elevation threshold for yield stress                                       | Yield stress     | -444.8608285471192                               | m a.s.l.                             |
| enth_till_friction_angle_bed_max | Upper bed elevation threshold for yield stress                                       | Yield stress     | 2982.864772500515                                | m a.s.l.                             |
| ent_till_friction_angle_phi_min  | Minimum till friction angle in bed-elevation dependent scheme                        | Yield stress     | 15.0                                             | °                                    |
| enth_till_friction_angle_phi_max | Maximum till friction angle in bed-elevation dependent scheme                        | Yield stress     | 50.0                                             | °                                    |
| enth_uthreshold                  | Pseudo-plastic sliding law U threshold                                               | Sliding          | 1244.8467164648443                               | m yr <sup>-1</sup>                   |
| enth_drain_rate                  | Water draining rate                                                                  | Yield stress     | 0.001                                            | mm yr <sup>-1</sup>                  |

| IGM module / parameter name   | Description                                                  | System component             | Value              | Unit              |
|-------------------------------|--------------------------------------------------------------|------------------------------|--------------------|-------------------|
| enth_till_wat_max             | Maximum water till thickness                                 | Yield stress                 | 2.0                | m                 |
| enth_default_bheatflx         | Geothermal heat flux                                         | Basal melt                   | 0.065              | W m <sup>-2</sup> |
| temperature_offset_air_to_ice | Surface air-to-ice temperature offset                        | Enthalpy                     | 2.9022389684294243 | °C                |
| enth_tauc_min                 | Lower capping bound for yield stress                         | Yield stress                 | 10000.0            | Pa                |
| enth_tauc_max                 | Upper capping bound for yield stress                         | Yield stress                 | 1 0000000000.0     | Pa                |
| <b>Avalanche</b>              |                                                              |                              |                    |                   |
| avalanche_update_freq         | Update frequency of the avalanche module                     | Avalanche                    | 5.0                | yr                |
| avalanche_angleOfRepose       | Angle of repose. For bed slopes above this, ice “avalanches” | Avalanche                    | 45.0               | °                 |
| <b>Gflex</b>                  |                                                              |                              |                    |                   |
| gflex_update_freq             | Update frequency of the gFlex GIA module                     | Glacial isostatic adjustment | 50.0               | yr                |
| gflex_default_Te              | Lithospheric effective elastic thickness                     | Glacial isostatic adjustment | 45556.89245060796  | m                 |
| gflex_dx                      | Spatial grid resolution of the gFlex GIA module              | Glacial isostatic adjustment | 2000.0             | m                 |

80

**Table S2** Initial monthly temperature and precipitation (similar to present-day). The data is derived from climate data averaged over 1981–2010 from a weather station in Modane, France, located at 1228 m a.s.l. within the model domain (Meteo France, 2022), precipitation values were uniformly multiplied by 1.6. Throughout the model runs, temperature values were modified by the temperature forcing.

| Month     | Temperature (°C) | Precipitation (kg m <sup>-2</sup> yr <sup>-1</sup> <i>we</i> ) |
|-----------|------------------|----------------------------------------------------------------|
| January   | -1.4             | 1040.610                                                       |
| February  | -0.4             | 1150.180                                                       |
| March     | 3.3              | 876.608                                                        |
| April     | 6.4              | 974.000                                                        |
| May       | 11.4             | 1065.120                                                       |
| June      | 14.4             | 1129.840                                                       |
| July      | 16.9             | 788.000                                                        |
| August    | 16.6             | 1046.270                                                       |
| September | 12.8             | 1040.240                                                       |
| October   | 8.7              | 1246.100                                                       |
| November  | 2.2              | 1217.500                                                       |
| December  | -0.8             | 1074.540                                                       |
